# Supplementary material for: Alternative Plant Vitrification Solution A3-80% and Initial Ammonium-Free Regrowth Medium Enable Cryobanking of Chrysanthemum Germplasm
Source: MDPI journal article supplement (doi:10.3390/plants12051059), 2023-02-27
Supplement: s1 [file s1]

Table S1. List of chrysanthemum accessions and regeneration of cryopreserved varieties in 2019-2021.

| No. | Year | Type     | Accession No. | Variety Name  | LN_surv(%) | LN_rege(%) |
|-----|------|----------|---------------|---------------|------------|------------|
| 1   | 2019 | pot      | 321686        | Gaya baby     | 76.7       | 80.0       |
| 2   | 2019 | pot      | 321695        | Golden pearl  | 86.7       | 60.0       |
| 3   | 2019 | spray    | 299603        | Green diamond | 85.7       | 66.7       |
| 4   | 2019 | spray    | 321717        | Green sense   | 85.7       | 71.4       |
| 5   | 2019 | spray    | 321718        | Green pasta   | 77.3       | 75.0       |
| 6   | 2019 | spray    | 321671        | Noble wine    | 92.0       | 76.0       |
| 7   | 2019 | standard | 321691        | Danmi         | 88.2       | 76.5       |
| 8   | 2019 | spray    | 321636        | Dorothy       | 85.7       | 85.7       |
| 9   | 2019 | spray    | 321719        | Lime farm     | 85.7       | 64.3       |
| 10  | 2019 | spray    | 281240        | Magics        | 87.5       | 87.5       |
| 11  | 2019 | spray    | 321720        | Morning angel | 77.8       | _*         |
| 12  | 2019 | standard | 310045        | Baekgang      | 60.0       | 50.0       |
| 13  | 2019 | spray    | 321722        | Bravo hope    | 63.6       | 63.6       |
| 14  | 2019 | spray    | 321723        | Vivace        | 95.5       | 77.3       |
| 15  | 2019 | standard | 321644        | Sunmi         | 88.2       | 88.2       |
| 16  | 2019 | standard | 321733        | Seolsong      | 91.7       | 91.7       |
| 17  | 2019 | spray    | 321724        | Sugar cream   | 81.8       | 81.8       |
| 18  | 2019 | pot      | 321678        | Snow beam     | 82.8       | 52.6       |
| 19  | 2019 | standard | 245232        | Shinshinma    | 78.3       | 69.6       |
| 20  | 2019 | spray    | 321726        | Sunny farm    | 93.3       | 80.0       |
| 21  | 2019 | spray    | 281236        | Amber         | 92.6       | 77.8       |
| 22  | 2019 | spray    | 321679        | Elsa          | 90.0       | 90.0       |
| 23  | 2019 | spray    | 309230        | Yes ruby      | 88.9       | 88.9       |
| 24  | 2019 | spray    | 309232        | Yes holic     | 90.0       | 80.0       |
| 25  | 2019 | spray    | 309233        | Yellow cap    | -          | -          |
| 26  | 2019 | spray    | 321680        | Orange cap    | 62.5       | 50.0       |
| 27  | 2019 | spray    | 321728        | Orange farm   | 82.6       | 65.2       |
| 28  | 2019 | spray    | 281237        | Joy pink      | 91.7       | 91.7       |
| 29  | 2019 | pot      | 321689        | Corona yellow | 80.0       | 72.0       |
| 30  | 2019 | pot      | 321674        | Corona pink   | 70.6       | 55.9       |
| 31  | 2019 | spray    | 321650        | Kids orange   | 88.5       | 76.9       |
| 32  | 2019 | spray    | 321635        | Purple cap    | 76.5       | 70.6       |
| 33  | 2019 | pot      | 321693        | Purple pearl  | 66.7       | 44.4       |
| 34  | 2019 | pot      | 321696        | Peach egg     | 70.8       | 62.5       |
| 35  | 2019 | spray    | 309265        | Field green   | 64.3       | 64.3       |
| 36  | 2019 | spray    | 321730        | Pink farm     | 70.0       | 70.0       |

|    |      |          |        |                |       |       |      |
|----|------|----------|--------|----------------|-------|-------|------|
| 37 | 2019 | pot      | 321676 | Harmony red    | 81.0  | 72.8  |      |
| 38 | 2019 | pot      | 321682 | Harmony pink   | 86.2  | 79.3  |      |
| 39 | 2019 | spray    | 321731 | Honey pink     | 81.0  | 81.0  |      |
| 40 | 2019 | spray    | 321732 | White farm     | 80.0  | 80.0  | 81.5 |
| 41 | 2020 | pot      | 281242 | Breeze         | 100.0 | 96.7  |      |
| 42 | 2020 | pot      | 281243 | Trumpf yellow  | 78.3  | 66.1  |      |
| 43 | 2020 | pot      | 321662 | Gaya neon      | 80.0  | 66.7  |      |
| 44 | 2020 | pot      | 321670 | Gaya sunshine  | 68.3  | 68.3  |      |
| 45 | 2020 | spray    | -*     | Golden eye     | 80.0  | 73.3  |      |
| 46 | 2020 | pot      | 246228 | Green valley   | 83.8  | 69.4  |      |
| 47 | 2020 | spray    | 234217 | Green witch    | 84.2  | 84.2  |      |
| 48 | 2020 | spray    | -      | Daumi          | 88.9  | 72.2  |      |
| 49 | 2020 | spray    | 234155 | Dublin         | 73.3  | 60.0  |      |
| 50 | 2020 | pot      | 244568 | Day dream      | 91.7  | 88.7  |      |
| 51 | 2020 | spray    | 321664 | Dimple         | 92.9  | 71.4  |      |
| 52 | 2020 | spray    | -      | Lovely song    | 70.0  | 60.0  |      |
| 53 | 2020 | pot      | 281241 | Red wing       | 75.0  | 68.3  |      |
| 54 | 2020 | spray    | 234159 | Lolly farm     | 85.8  | 66.7  |      |
| 55 | 2020 | spray    | 321669 | Magic ballade  | 81.3  | 68.8  |      |
| 56 | 2020 | spray    | 321721 | Moulin rouge   | 93.3  | 73.3  |      |
| 57 | 2020 | standard | 245257 | Biarritz       | 84.3  | 67.1  |      |
| 58 | 2020 | pot      | 244573 | By minipot     | 80.1  | 67.6  |      |
| 59 | 2020 | spray    | 234102 | Viking         | 83.3  | 77.8  |      |
| 60 | 2020 | spray    | -      | Bodre          | 73.3  | 73.3  |      |
| 61 | 2020 | spray    | -      | Bodmi          | 93.3  | 86.7  |      |
| 62 | 2020 | spray    | -      | Bolkar red     | 70.0  | 60.0  |      |
| 63 | 2020 | spray    | 321663 | Blue hope      | 100.0 | 100.0 |      |
| 64 | 2020 | pot      | 234123 | Visalia salmon | 96.4  | 90.1  |      |
| 65 | 2020 | spray    | 321668 | Biz            | 78.9  | 60.0  |      |
| 66 | 2020 | spray    | -      | Saebomi        | 85.5  | 75.9  |      |
| 67 | 2020 | pot      | 321692 | Shine pearl    | 61.9  | 58.3  |      |
| 68 | 2020 | standard | 321658 | Seolmi         | 100.0 | 87.5  |      |
| 69 | 2020 | spray    | 234208 | Serafina       | 62.5  | 58.3  |      |
| 70 | 2020 | standard | 234189 | Seinonami      | 80.0  | 73.3  |      |
| 71 | 2020 | standard | 246223 | Sumi           | 100.0 | 94.4  |      |
| 72 | 2020 | spray    | 321725 | Snow sense     | 68.3  | 68.3  |      |
| 73 | 2020 | standard | 246234 | Shiosai        | 92.3  | 61.5  |      |
| 74 | 2020 | standard | 281234 | Eye green      | 67.7  | 70.1  |      |
| 75 | 2020 | spray    | 321672 | Eye ball       | 84.6  | 84.6  |      |

|     |      |       |        |                 |       |      |
|-----|------|-------|--------|-----------------|-------|------|
| 76  | 2020 | spray | 234156 | Yen             | 84.7  | 73.9 |
| 77  | 2020 | spray | 321727 | Angel eye       | 81.7  | 70.0 |
| 78  | 2020 | spray | -      | Yes nour        | 87.5  | 81.3 |
| 79  | 2020 | pot   | 321690 | Orange egg      | 80.0  | 80.0 |
| 80  | 2020 | spray | 321657 | Orange kids     | 90.9  | 63.6 |
| 81  | 2020 | pot   | 321694 | Orange pearl    | 80.0  | 80.0 |
| 82  | 2020 | spray | 234210 | Water fog       | 83.3  | 66.7 |
| 83  | 2020 | spray | 234129 | Euro white      | 100.0 | 73.3 |
| 84  | 2020 | pot   | 244567 | Jagalro         | 86.4  | 85.7 |
| 85  | 2020 | spray | 321649 | Joy cream       | 88.9  | 94.4 |
| 86  | 2020 | pot   | 244561 | Chesapeake      | 100.0 | 93.3 |
| 87  | 2020 | pot   | 321647 | Cristal red     | 85.7  | 78.6 |
| 88  | 2020 | spray | 234182 | Two tone        | 100.0 | 93.8 |
| 89  | 2020 | pot   | 321675 | Point egg       | 65.0  | 60.0 |
| 90  | 2020 | spray | 234131 | Progi           | 87.3  | 75.4 |
| 91  | 2020 | spray | -      | Prima pink      | 68.3  | 67.5 |
| 92  | 2020 | spray | 321665 | Fiore           | 81.7  | 74.2 |
| 93  | 2020 | pot   | 244575 | Poico Fun       | 93.3  | 80.0 |
| 94  | 2020 | pot   | 244566 | Pixie Time Pink | 80.9  | 66.6 |
| 95  | 2020 | spray | 234158 | Feeling green   | 90.0  | 85.0 |
| 96  | 2020 | pot   | 321685 | Pink egg        | 75.0  | 80.0 |
| 97  | 2020 | spray | -      | Pink pride      | 66.7  | 58.3 |
| 98  | 2020 | spray | 234207 | Pinky           | 93.3  | 83.3 |
| 99  | 2020 | pot   | 321684 | Harmony purple  | 86.7  | -    |
| 100 | 2020 | spray | 244560 | Hirario         | 97.2  | 87.3 |
| 101 | 2021 | pot   | 281244 | Trumpf violet   | 100.0 | 69.2 |
| 102 | 2021 | pot   | 321613 | Gaya gold       | 93.8  | 76.8 |
| 103 | 2021 | pot   | 246226 | Gaya glory      | 89.5  | 76.3 |
| 104 | 2021 | pot   | 321660 | Gaya nano       | 73.3  | 60.0 |
| 105 | 2021 | pot   | 321640 | Gaya dream      | 87.8  | 75.6 |
| 106 | 2021 | pot   | 234224 | Gaya red        | 70.0  | -    |
| 107 | 2021 | pot   | 324642 | Gaya luna       | 92.2  | 78.0 |
| 108 | 2021 | pot   | 281246 | Gaya ruby       | 100.0 | 91.7 |
| 109 | 2021 | pot   | 321653 | Gaya rouge      | 92.9  | 69.0 |
| 110 | 2021 | pot   | 321641 | Gaya sunset     | 80.1  | 74.2 |
| 111 | 2021 | pot   | 321661 | Gaya sense      | 93.3  | 93.3 |
| 112 | 2021 | pot   | 246219 | Gaya sun        | 86.7  | 66.7 |
| 113 | 2021 | pot   | 246225 | Gaya art        | 91.2  | 78.5 |
| 114 | 2021 | pot   | 234228 | Gaya orange     | 88.7  | 70.3 |

|     |      |          |        |                |       |       |
|-----|------|----------|--------|----------------|-------|-------|
| 115 | 2021 | pot      | 321687 | Gaya purple    | 89.1  | 76.0  |
| 116 | 2021 | pot      | 234230 | Gaya white     | 82.5  | 66.3  |
| 117 | 2021 | pot      | 281248 | Gaya hit       | 86.4  | 73.5  |
| 118 | 2021 | pot      | 321655 | Golden egg     | 100.0 | 100.0 |
| 119 | 2021 | pot      | 246222 | Golden tree    | 88.9  | -     |
| 120 | 2021 | spray    | 321666 | Green flora    | 83.3  | 66.7  |
| 121 | 2021 | pot      | 244571 | Dark free poly | 85.0  | 65.0  |
| 122 | 2021 | spray    | 245255 | Delhi prime    | 86.7  | 66.7  |
| 123 | 2021 | pot      | 281249 | Lemon eyes     | 83.1  | 76.8  |
| 124 | 2021 | spray    | 244553 | Rocky          | 87.8  | 70.0  |
| 125 | 2021 | spray    | 244548 | Rerence        | 87.5  | 81.3  |
| 126 | 2021 | pot      | 244564 | Liz way        | 77.7  | 70.3  |
| 127 | 2021 | pot      | 244562 | Little rock    | 84.1  | 74.9  |
| 128 | 2021 | pot      | 244563 | Madras         | 80.0  | 70.0  |
| 129 | 2021 | spray    | 321656 | Magic star     | 90.0  | 80.0  |
| 130 | 2021 | pot      | 244572 | Veria dark     | 95.0  | 90.0  |
| 131 | 2021 | spray    | 234132 | Vesuvio white  | 95.8  | 83.3  |
| 132 | 2021 | spray    | 245256 | Biarritz pink  | 85.7  | 76.2  |
| 133 | 2021 | standard | 234191 | Seino makoto   | 83.8  | 72.5  |
| 134 | 2021 | standard | 234190 | Seino kyoku    | 93.3  | 80.0  |
| 135 | 2021 | spray    | 321677 | Sun green      | 86.7  | 73.3  |
| 136 | 2021 | pot      | 244576 | Amarillo       | 100.0 | 95.0  |
| 137 | 2021 | standard | 327372 | Yonglong       | 76.7  | 65.8  |
| 138 | 2021 | spray    | 327369 | Yes mimi       | 93.8  | 87.5  |
| 139 | 2021 | standard | 281239 | Euro yellow    | 89.6  | 82.1  |
| 140 | 2021 | standard | 246235 | Yucca          | 100.0 | 80.0  |
| 141 | 2021 | spray    | 246230 | Jembla         | 83.3  | 75.0  |
| 142 | 2021 | pot      | 234229 | G&B            | 91.7  | 66.7  |
| 143 | 2021 | pot      | 327168 | Corona heart   | 85.0  | 60.0  |
| 144 | 2021 | pot      | 321645 | Cristal ruby   | 100.0 | 80.0  |
| 145 | 2021 | pot      | 321646 | Cristal bronze | 85.0  | 75.0  |
| 146 | 2021 | pot      | 246221 | Purple tree    |       | -     |
| 147 | 2021 | pot      | -      | Purple pink    | 86.7  | 80.0  |
| 148 | 2021 | pot      | 321654 | Pearl egg      | 86.7  | 73.3  |
| 149 | 2021 | pot      | 244574 | Pico amor      | 90.0  | 70.0  |
| 150 | 2021 | pot      | 234220 | Pink eyes      | 90.0  | 76.7  |
| 151 | 2021 | pot      | 321681 | Harmony yellow | 92.0  | 79.5  |
| 152 | 2021 | pot      | 321688 | Harmony white  | 100.0 | 70.0  |
| 153 | 2021 | pot      | 246220 | Happy eye      | 93.3  | 93.3  |

|      |      |     |        |             |             |             |      |
|------|------|-----|--------|-------------|-------------|-------------|------|
| 154  | 2021 | pot | 234226 | White angel | 90.0        | -           | 88.8 |
| Mean |      |     |        |             | <b>84.9</b> | <b>74.8</b> |      |

\* registration number is not available yet.

\*\* survival and regeneration data were not recorded in the excel form, possible due to the contamination and miss Variety name was translated from Korean to English.

In 2021, six more accessions of sweet potato germplasm was cryopreserved, but not included in this table.

\_\_\_\_\_

\_\_\_\_\_

72.9







76.0

ing.
